# Supplementary material for: Biological role of EPS from Pseudomonas syringae pv. syringae UMAF0158 extracellular matrix, focusing on a Psl-like polysaccharide
Source: PubMed Central journal article supplement (PMC7550585; doi:10.1038/s41522-020-00148-6), 2020-10-12
Supplement: 41522_2020_148_MOESM1_ESM.pdf [file 41522_2020_148_MOESM1_ESM.pdf]

## Supplementary Material

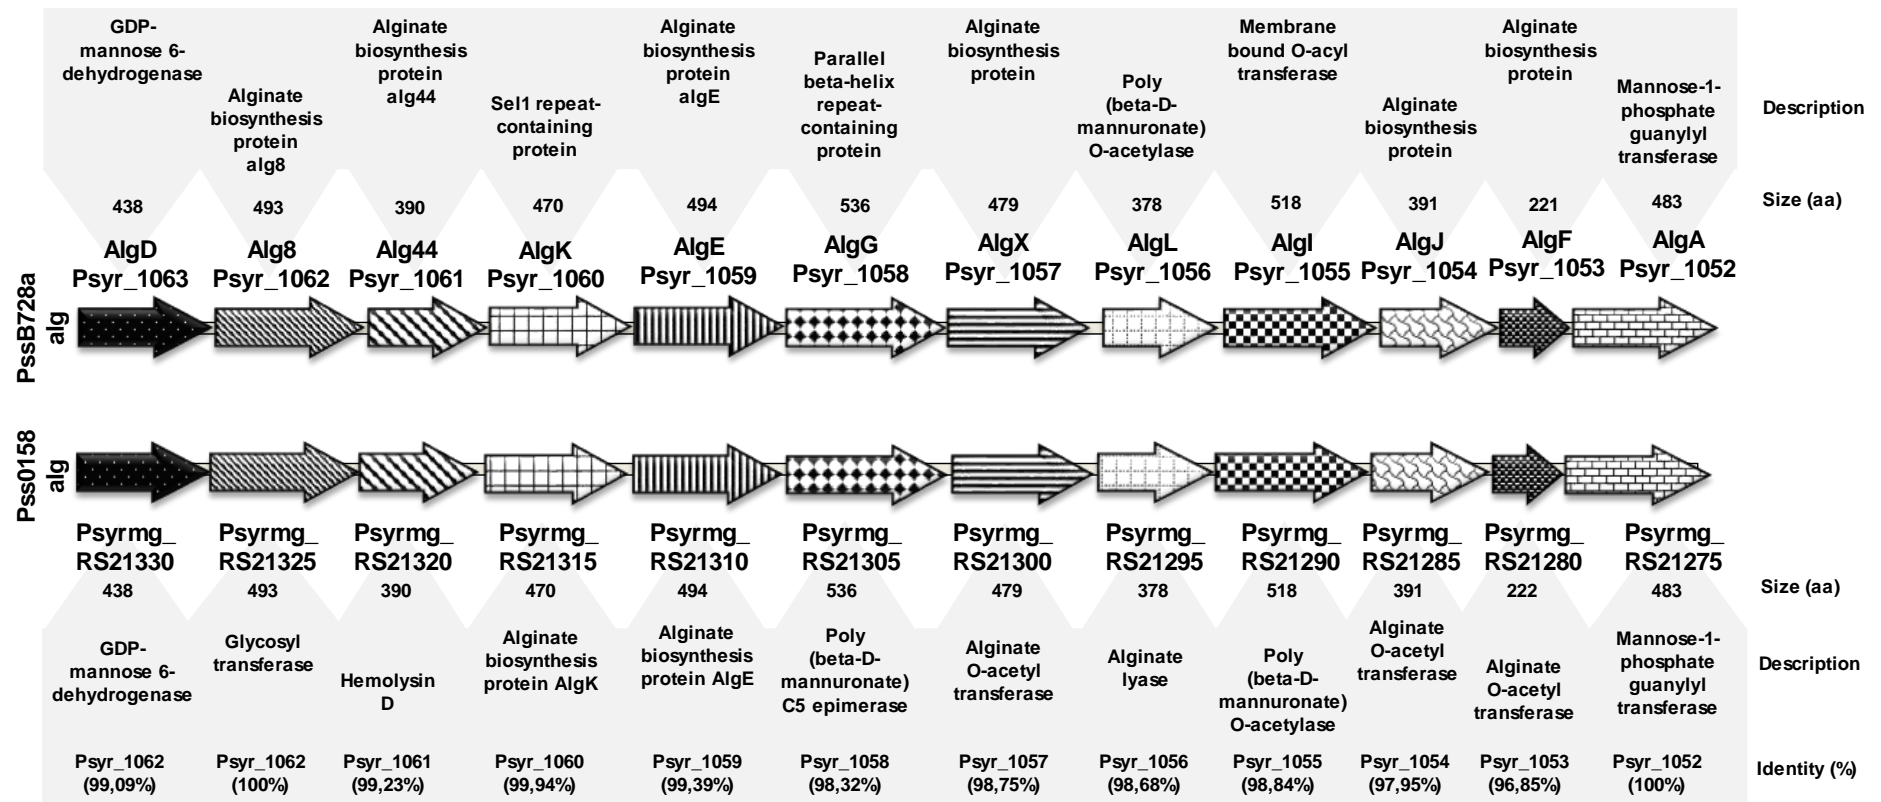

Supplementary Figure 1. Comparison of proteins encoded by the alginate operon of *Pseudomonas syringae* pv. *syringae* B728a (PssB728a) and *Pseudomonas syringae* pv. *syringae* UMAF0158 (PssUMAF0158). The Psyr\_1052-Psyr\_1063 region of PssB728a encodes alginate polysaccharide, and the Psyrmg\_RS21275-Psyrmg\_RS21330 region of PssUMAF0158 was identified as an orthologue. The figure shows the sizes of the proteins as the number of amino acids, their functions and the percentage of identity between the two

strains being compared. Putative functions have been obtained from the Pseudomonas Genome Database (<https://www.pseudomonas.com/>).

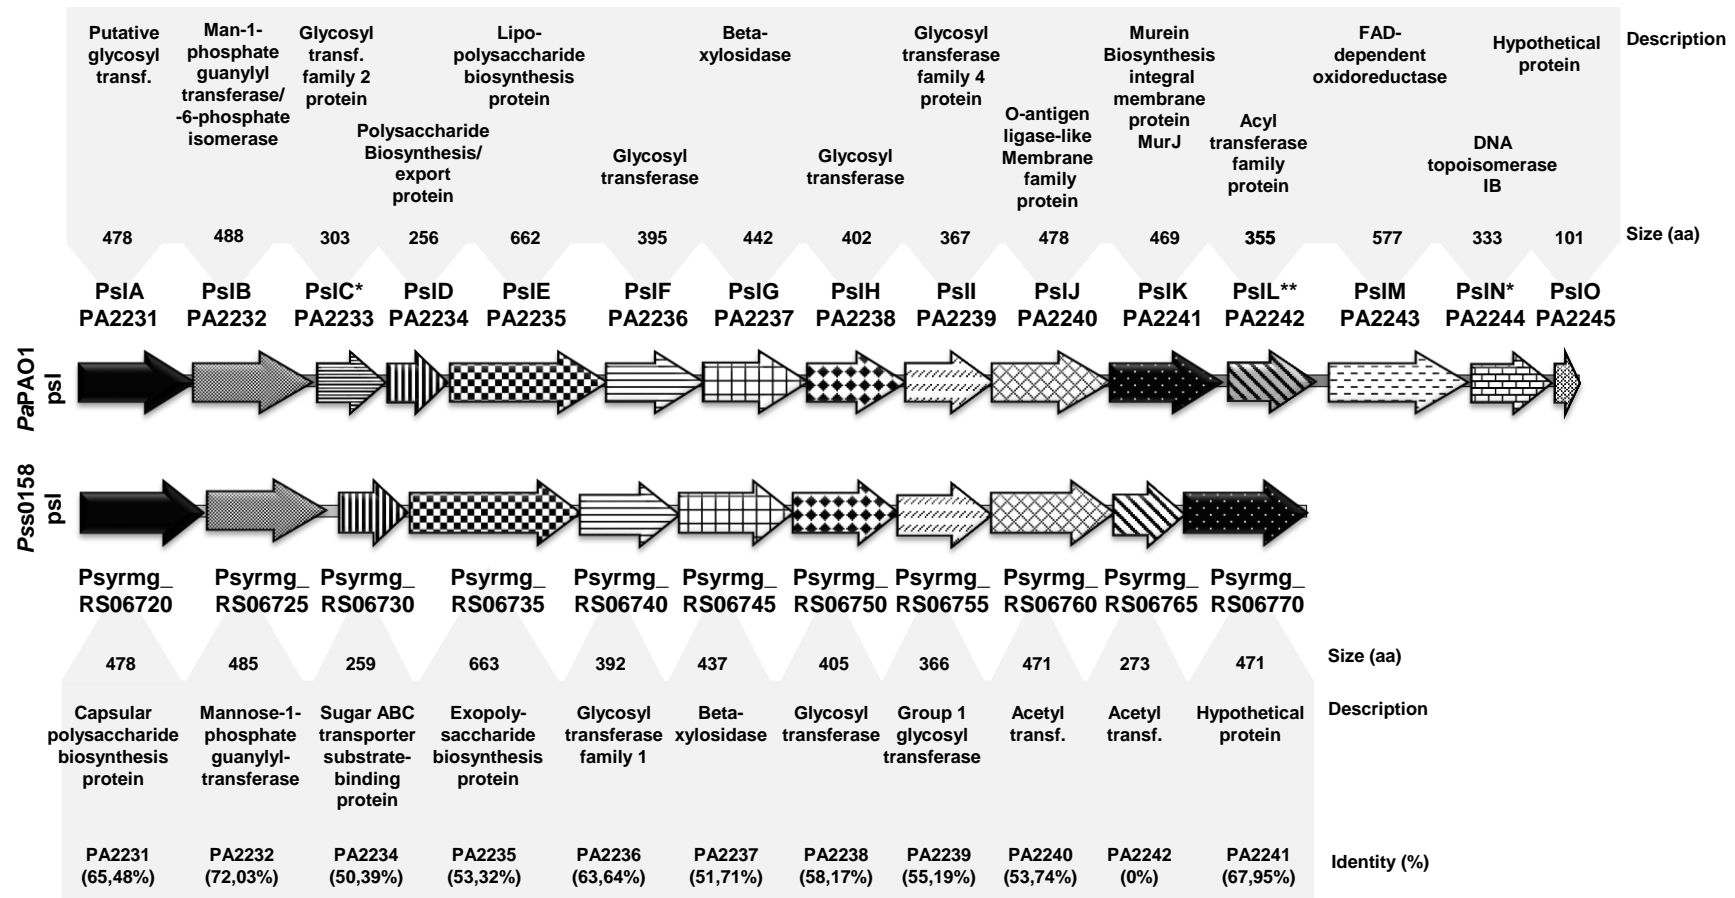

**Supplementary Figure 2. Comparison of proteins encoded by the *psl* operon of *P. aeruginosa* PAO1 (PAO1) and PssUMAF0158 (PssUMAF0158).** The PA2231-PA2245 region of PAO1 encodes a Psl polysaccharide, and the Psyrmg\_RS06720-Psyrmg\_RS06770 region of PssUMAF0158 was identified as similar. The PslC-like and PslN-like proteins (\*) seem to be encoded outside the *psl*-like cluster at Psyrmg\_RS00890 and Psyrmg\_RS04445. The *pslM* and *pslO* genes are missing, although they are not required to produce the polysaccharide<sup>29</sup>. The *pslL* gene of PAO1 (\*\*) encodes for an acyltransferase that has no identity with any protein encoded in the

PssUMAF0158 genome. However, the *psyrmg\_RS06765* gene, located within the *psl*-like cluster, encodes an acetyltransferase that may replace the role of PslL in PssUMAF0158. In fact, this has already been illustrated in the *P. syringae* B728a strain, in which the acetyltransferase Psyr\_3310 encoded by a gene located between *pslJ* and *pslK* may fulfil the normal function of *pslL* in *P. aeruginosa* strains<sup>40</sup>. The figure shows the sizes of the proteins as the number of amino acids, their functions and the percentage of identity between the two strains being compared. Putative functions have been obtained from the Pseudomonas Genome Database (<https://www.pseudomonas.com/>).

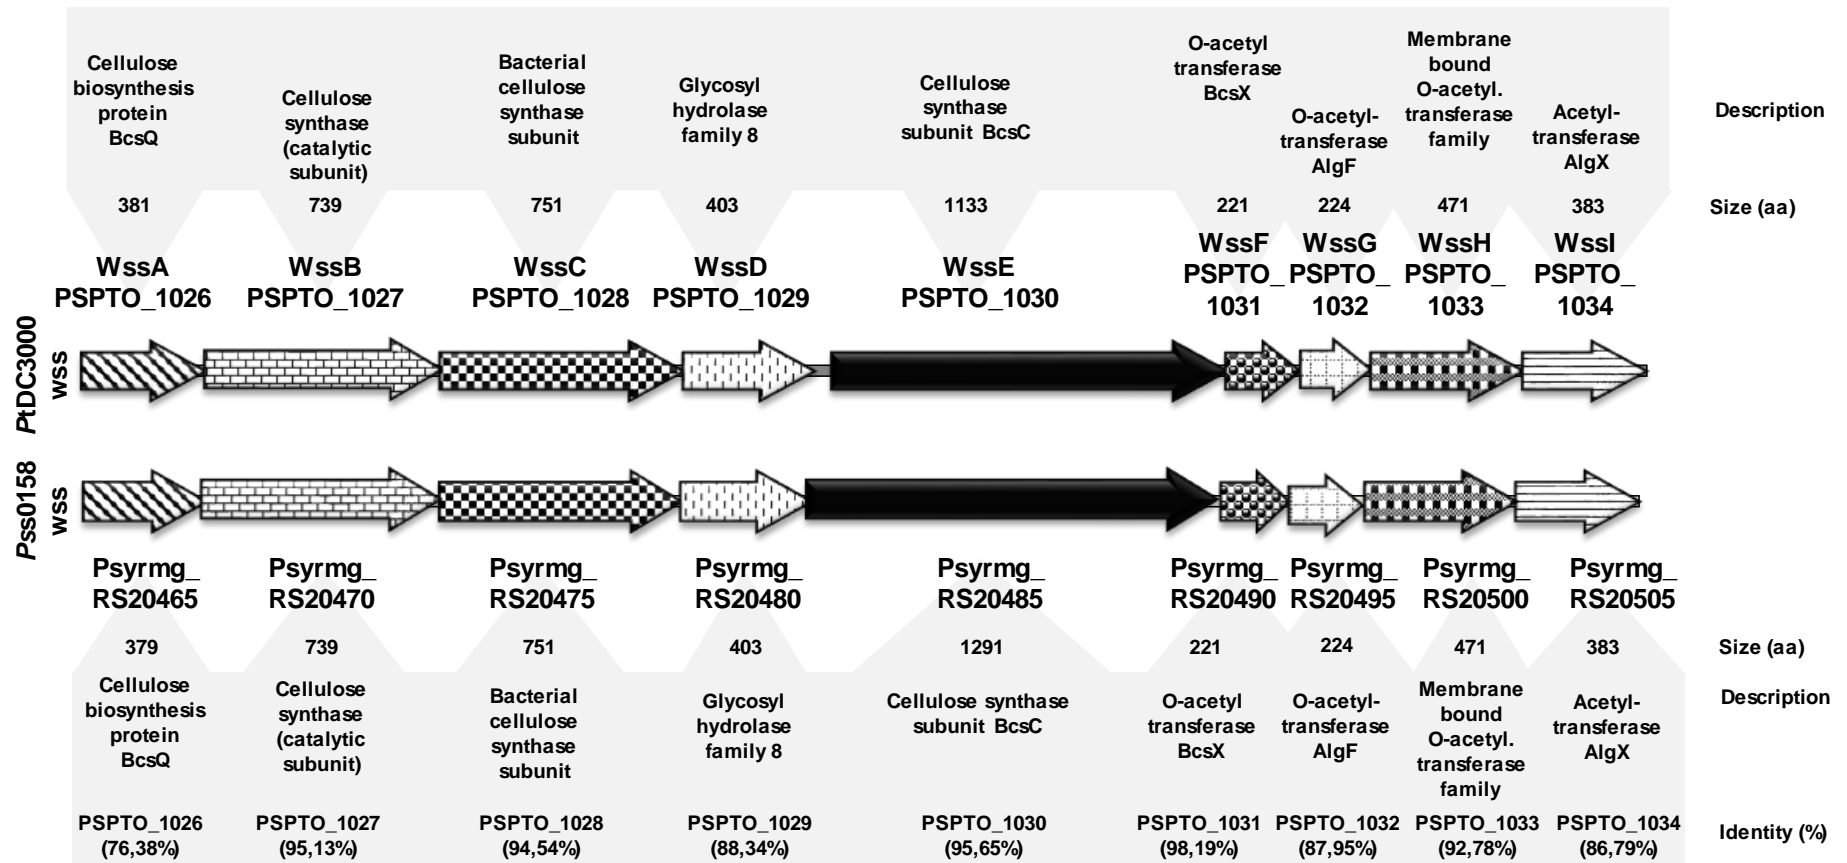

**Supplementary Figure 3. Comparison of proteins encoded by the cellulose operon of *P. syringae* pv. tomato DC3000 (PtDC3000) and *P. syringae* pv. syringae UMAF0158 (PssUMAF0158).** The Pspto\_1026-Pspto\_1034 region of PtDC3000 encodes cellulose polysaccharide, and the Psyrmg\_RS20465-Psyrmg\_RS20505 region of PssUMAF0158 was identified as an orthologue. The figure shows the sizes of the proteins as the number of amino acids, their functions and the percentage of identity between the two strains being

compared. Putative functions have been obtained from the Pseudomonas Genome Database (<https://www.pseudomonas.com/>) and the Protein Family Software (PFAM) (<https://pfam.xfam.org/>).

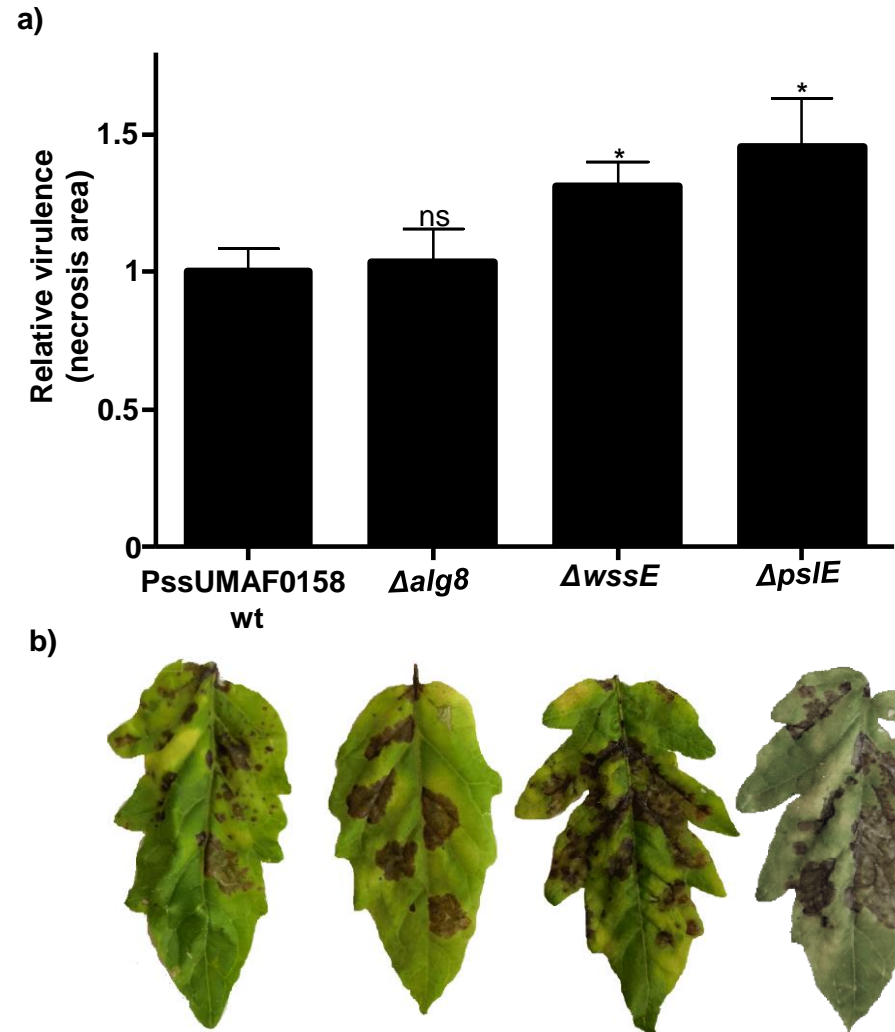

Supplementary Figure 4. Analysis of the alginate, cellulose and Psl-like polysaccharides as putative virulence factors of *P. syringae* pv. *syringae* UMAF0158. a) Relative virulence of PssUMAF0158 wild-type and extracellular matrix mutants in tomato leaflets measured

by lesion size. Four leaflets per experiment and three independent experiments were performed; b) Representative symptoms developed on tomato leaflets at 6 days postinoculation. No significant differences were found in virulence between wild-type and  $\Delta alg8$  mutant. PssUMAF0158 wild-type (PssUMAF0158 wt), PssUMAF0158 alginate mutant ( $\Delta alg8$ ), PssUMAF0158 cellulose mutant ( $\Delta wssE$ ) and PssUMAF0158 Psl-like polysaccharide mutant ( $\Delta pslE$ ) were tested. Statistical significance was assessed by two-tailed Mann–Whitney test (\* $p < 0.05$ ). Error bars correspond to the standard error (SE).



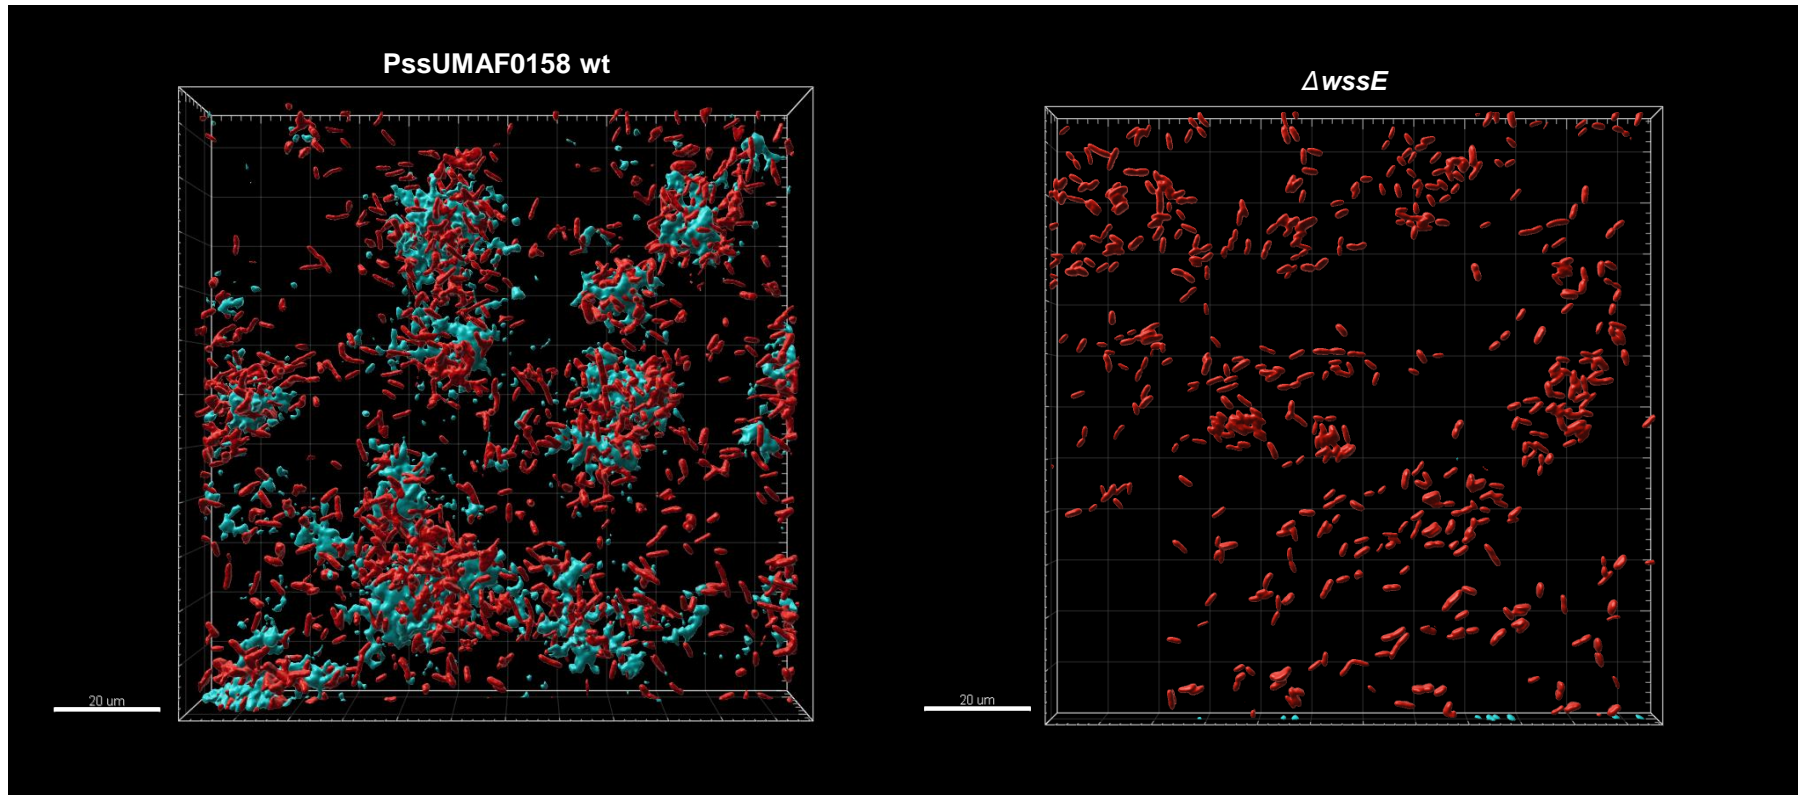

**Supplementary Figure 5. Cellulose staining of the biofilm.** Representative 12h 3D biofilm images of the dsRed-tagged *P. syringae* pv. *syringae* UMAF0158 wild-type (PssUMAF0158 wt) and dsRed-tagged cellulose mutant ( $\Delta wssE$ ) stained with calcofluor dye (blue) are shown. The obtained images were analysed with the Leica Application Suite (Mannheim, Germany) and the IMARIS software package (Bitplane, Switzerland). Scale bar 20  $\mu$ m.

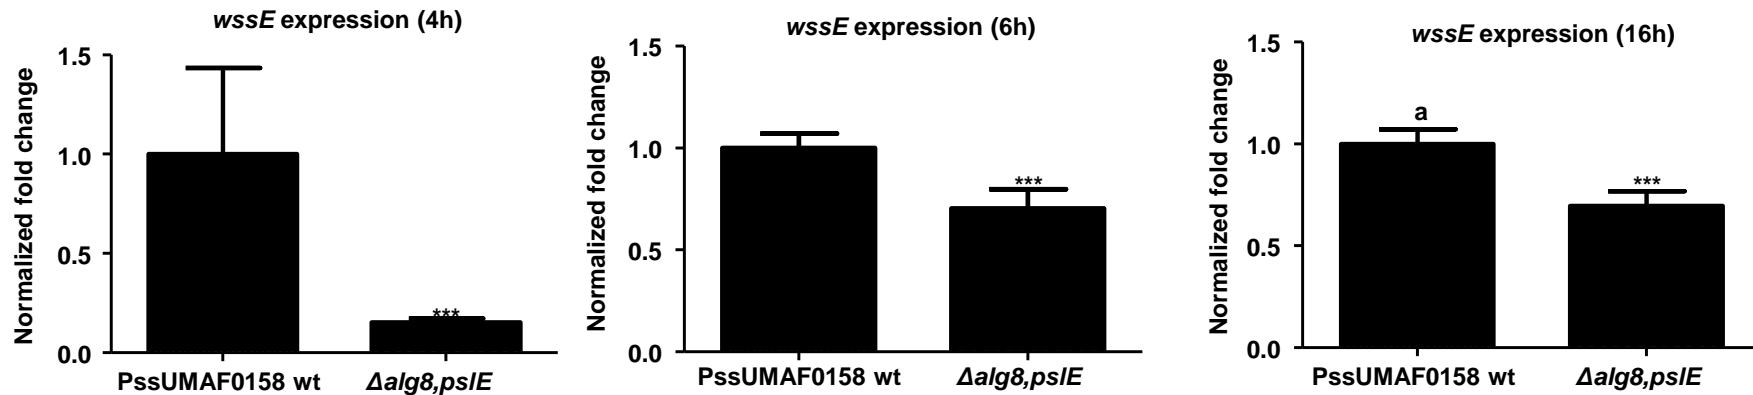

**Supplementary Figure 6. qRT-PCR experiments of the *wssE* gene from pellicles after 4, 6- and 16h post-inoculation at 25°C.** Results are shown as the fold-change expression of *wssE* gene in  $\Delta alg8, psIE$  double mutant compared to the wild-type. Expression of *wssE* gene is lower in the double mutant compared to the wild-type, which is not consistent with the phenotype observed in  $\Delta alg8, psIE$  regarding the binding of Congo red in the pellicles. PssUMAF0158 wild-type (PssUMAF0158 wt) and PssUMAF0158  $\Delta alg8, psIE$  double mutant ( $\Delta alg8, psIE$ ) were tested. Statistical significance was assessed by two-tailed Mann–Whitney test (\*\*\*) $p < 0.001$ . Error bars correspond to the standard error (SE).

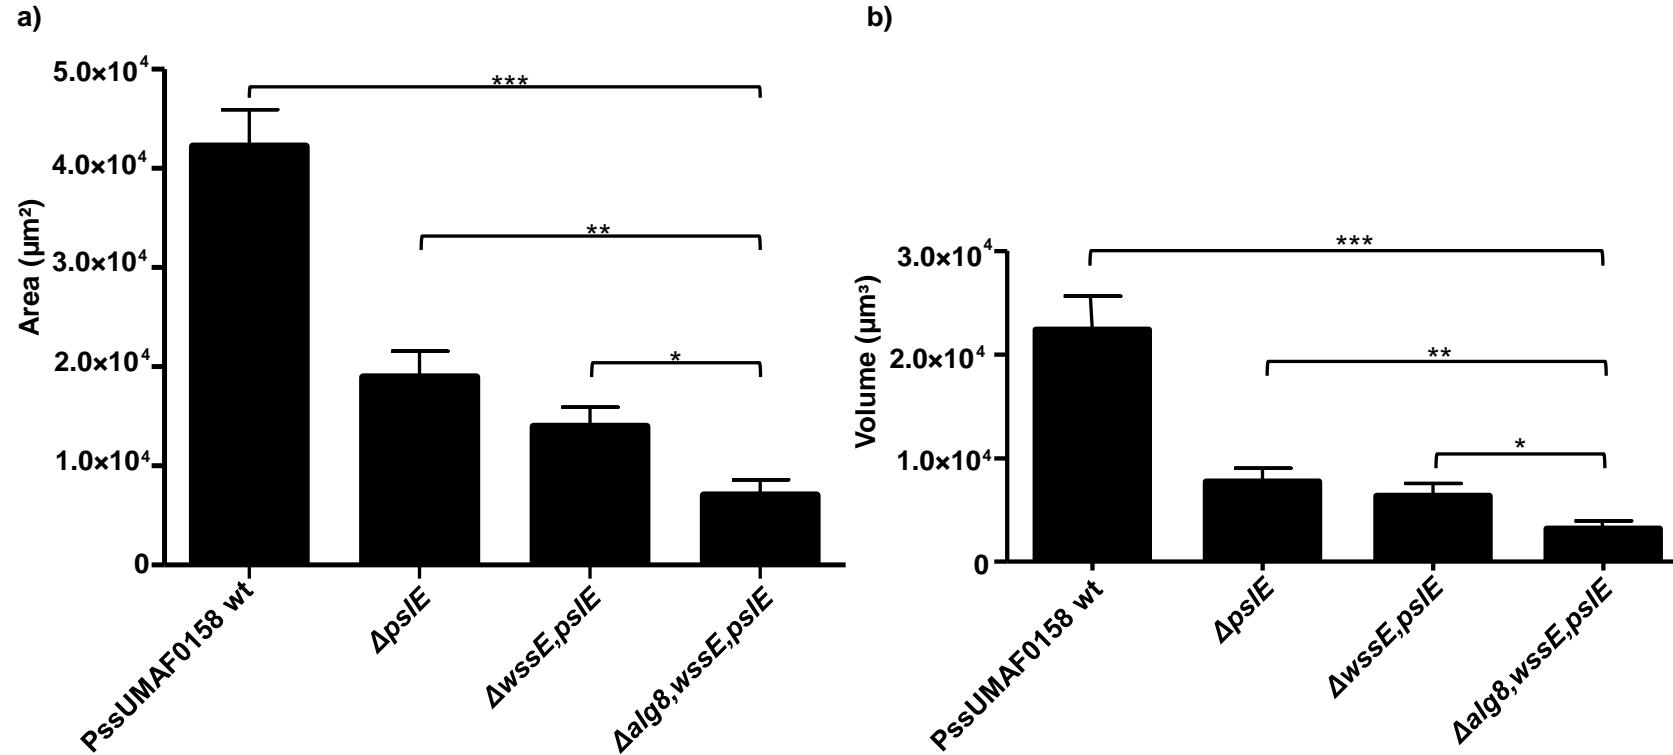

**Supplementary Figure 7. Flow-cell chamber experiments.** a) Area covered ( $\mu\text{m}^2$ ) by 48h biofilms; b) Volume covered ( $\mu\text{m}^3$ ) by 48h biofilms. PssUMAF0158 wild-type (PssUMAF0158 wt), PssUMAF0158  $\Delta\text{pslE}$  single mutant ( $\Delta\text{pslE}$ ), PssUMAF0158  $\Delta\text{wssE,pslE}$  double mutant ( $\Delta\text{wssE,pslE}$ ) and PssUMAF0158  $\Delta\text{alg8,wssE,pslE}$  triple mutant ( $\Delta\text{alg8,wssE,pslE}$ ) were tested. Statistical significance was assessed by two-tailed Mann–Whitney test (\* $p < 0.05$ , \*\* $p < 0.01$ , \*\*\* $p < 0.001$ ). Error bars correspond to the standard error (SE).

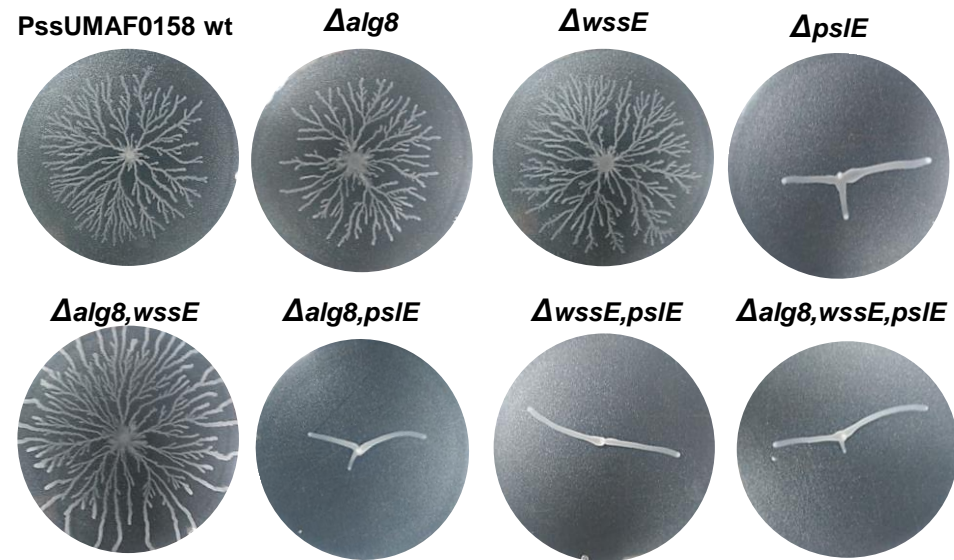

**Supplementary Figure 8. Swarming motility.** Representative images of swarming plates after 48h of growth at 25°C. The PssUMAF0158 wild-type (PssUMAF0158 wt), PssUMAF0158 alginate mutant ( $\Delta alg8$ ), PssUMAF0158 cellulose mutant ( $\Delta wssE$ ), PssUMAF0158 Psl-like polysaccharide mutant ( $\Delta psIE$ ), PssUMAF0158  $\Delta alg8, wssE$  double mutant ( $\Delta alg8, wssE$ ), PssUMAF0158  $\Delta alg8, psIE$  double mutant ( $\Delta alg8, psIE$ ), PssUMAF0158  $\Delta wssE, \Delta psIE$  double mutant ( $\Delta wssE, psIE$ ) and PssUMAF0158  $\Delta alg8, wssE, psIE$  triple mutant ( $\Delta alg8, wssE, psIE$ ) mutants were tested.

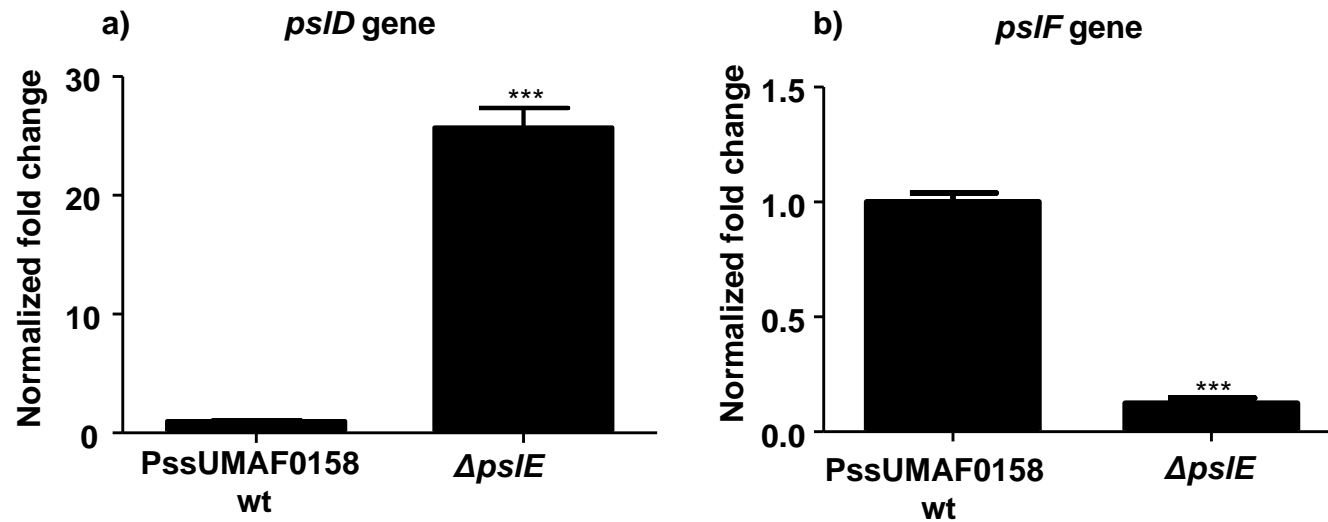

**Supplementary Figure 9. qRT-PCR experiments of the *psID* and *psIF* genes from TPG plates after 48h of growth at 25°C.** Results are shown as the fold-change expression of the selected genes in the  $\Delta psIE$  mutant strain compared to the wild-type. PssUMAF0158 wild-type (PssUMAF0158 wt) and PssUMAF0158 Psl-like mutant ( $\Delta psIE$ ) strains were tested. Three independent RNA extractions and two technical replicates per extraction were assessed. Statistical analysis was assessed by two-tailed Mann-Whitney test (\*\*\*>0.001). Error bars correspond to the standard error (SE).

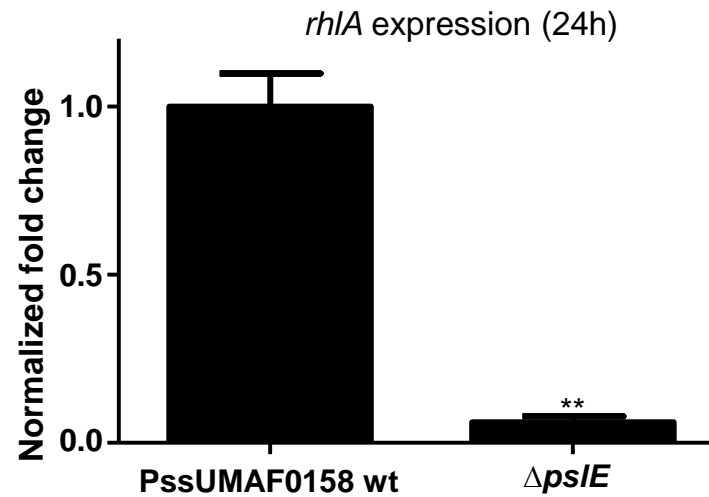

**Supplementary Figure 10. qRT-PCR experiments of the *rhIA* gene from TPG plate after 24h of growth at 25°C.** Results are shown as the fold-change expression of *rhIA* gene in  $\Delta psIE$  mutant compared to the wild-type. The expression of *rhIA* gene is lower in the mutant compared to the wild-type, which is consistent with the impairment in swarming motility observed in  $\Delta psIE$  mutant. PssUMAF0158 wild-type (PssUMAF0158 wt) and PssUMAF0158  $\Delta psIE$  mutant ( $\Delta psIE$ ) were tested. Statistical significance was assessed by two-tailed Mann–Whitney test (\*\* $p < 0.01$ ). Error bars correspond to the standard error (SE).

**Supplementary Table 1. Domains of proteins encoded by the *psl* cluster of *Pseudomonas aeruginosa* PAO1 and *Pseudomonas syringae* pv. *syringae* UMAF0158 strains.**

**Supplementary Table 1a. *Pseudomonas aeruginosa* PAO1 strain.**

| <b>Protein</b> | <b>Size<br/>(aa)</b> | <b>Domains</b>   | <b>Domain<br/>position</b> | <b>Description</b>                         |
|----------------|----------------------|------------------|----------------------------|--------------------------------------------|
| <b>PslA</b>    | 478                  | CoA_binding_3    | 70-248                     | CoA_binding                                |
|                |                      | Bac_transf       | 284-472                    | Bacteria sugar transferase                 |
| <b>PslB</b>    | 488                  | NTP_transferase  | 9-296                      | Nucleotidyl transferase                    |
|                |                      | MannoseP_isomer  | 325-475                    | Mannose-6-phosphate isomerase              |
| <b>PslC</b>    | 303                  | Glyco_transf_2_3 | 3-220                      | Glycosyltransferase like family 2          |
| <b>PslD</b>    | 256                  | Poly_export      | 49-129                     | Polysaccharide biosynthesis/export protein |
| <b>PslE</b>    | 662                  | GNVR             | 403-479                    | G-rich domain on putative tyrosine kinase  |
| <b>PslF</b>    | 395                  | Glycos_transf_1  | 192-365                    | Glycosyl transferases group 1              |
| <b>PslG</b>    | 442                  | Cellulase        | 48-285                     | Glycosyl hydrolase family 5                |
| <b>PslH</b>    | 402                  | Glyco_trans_4_4  | 16-206                     | Glycosyl transferase 4-like domain         |
|                |                      | Glyco_trans_1_4  | 222-359                    | Glycosyl transferases group 1              |
| <b>PslI</b>    | 367                  | Glyco_transf_4   | 17-183                     | Glycosyltransferase Family 4               |
|                |                      | Glyco_trans_1_4  | 204-308                    | Glycosyl transferases group 1              |

|             |     |               |                         |                                                   |
|-------------|-----|---------------|-------------------------|---------------------------------------------------|
| <b>PslJ</b> | 478 | -             | -                       | -                                                 |
| <b>PslK</b> | 469 | MurJ          | 30-442                  | Lipid II flippase MurJ                            |
| <b>PslL</b> | 355 | Acyl_transf_3 | 7-322                   | Acyltransferase family                            |
| <b>PslM</b> | 577 | FAD_binding_2 | 14-549                  | FAD binding domain                                |
| <b>PslN</b> | 333 | Topoisom_I    | 94-266                  | Eukaryotic DNA topoisomerase I,<br>catalytic core |
| <b>PslO</b> | 101 | -             | No predicted<br>domains | -                                                 |



**Supplementary Table 1b. *Pseudomonas syringae* pv. *syringae* UMAF0158 strain.**

| <b>Protein</b>              | <b>Description</b>                                  | <b>Identity</b>     | <b>Size<br/>(aa)</b> | <b>Domains</b>          | <b>Domain<br/>position</b> | <b>Domains description</b>                    |
|-----------------------------|-----------------------------------------------------|---------------------|----------------------|-------------------------|----------------------------|-----------------------------------------------|
| <b>PSYRMG_<br/>RS06720</b>  | Capsular polysaccharide<br>biosynthesis protein     | 65,48% with<br>PslA | 478                  | CoA_binding_3           | 70-248                     | CoA_binding                                   |
|                             |                                                     |                     |                      | Bac_transf              | 284-472                    | Bacteria sugar transferase                    |
| <b>PSYRMG_<br/>RS06725</b>  | Mannose-1-phosphate<br>guanylyltransferase          | 72,03% with<br>PslB | 485                  | NTP_transferase         | 6-294                      | Nucleotidyl transferase                       |
|                             |                                                     |                     |                      | MannoseP_isomer         | 323-473                    | Mannose-6-phosphate<br>isomerase              |
| <b>*PSYRMG_<br/>RS00890</b> | Rhamnosyltransferase                                | 48,84% with<br>PslC | 308                  | Glyco_transf_2_3        | 9-173                      | Glycosyltransferase like family<br>2          |
| <b>PSYRMG_<br/>RS06730</b>  | Sugar ABC transporter substrate-<br>binding protein | 50,39% with<br>PslD | 259                  | Poly_export             | 47-130                     | Polysaccharide<br>biosynthesis/export protein |
| <b>PSYRMG_<br/>RS06735</b>  | Exopolysaccharide biosynthesis<br>protein           | 53,32% with<br>PslE | 663                  | No predicted<br>domains | -                          | -                                             |
| <b>PSYRMG_<br/>RS06740</b>  | Glycosyl transferase family 1                       | 63,64% with<br>PslF | 392                  | Glycos_transf_1         | 189-367                    | Glycosyl transferases group 1                 |
| <b>PSYRMG_<br/>RS06745</b>  | Beta-xylosidase                                     | 51,71% with<br>PslG | 437                  | Cellulase               | 47-279                     | Glycosyl hydrolase family 5                   |

|                                   |                              |             |     |                 |         |                                                 |
|-----------------------------------|------------------------------|-------------|-----|-----------------|---------|-------------------------------------------------|
| <b>PSYRMG_</b><br><b>RS06750</b>  | Glycosyl transferase         | 58,17% with | 405 | Glyco_trans_4_4 | 16-205  | Glycosyl transferase 4-like domain              |
|                                   |                              | PslH        |     | Glyco_trans_1_4 | 222-235 | Glycosyl transferases group 1                   |
| <b>PSYRMG_</b><br><b>RS06755</b>  | Group 1 glycosyl transferase | 55,19% with | 366 | Glycos_transf_1 | 200-308 | Glycosyl transferases group 1                   |
|                                   |                              | PslI        |     |                 |         |                                                 |
| <b>PSYRMG_</b><br><b>RS06760</b>  | Hypothetical protein         | 53,74% with | 471 | Wzy_C           | 252-380 | O-Antigen ligase                                |
|                                   |                              | PslJ        |     |                 |         |                                                 |
| <b>PSYRMG_</b><br><b>RS06765</b>  |                              | 0%          | 273 | Hexapep         | 202-235 | Bacterial transferase hexapeptide (six repeats) |
|                                   | Acetyltransferase            |             |     |                 |         |                                                 |
| <b>PSYRMG_</b><br><b>RS06770</b>  | Hypothetical protein         | 67,95% with | 471 | MurJ            | 28-434  | Lipid II flippase MurJ                          |
|                                   |                              | PslK        |     |                 |         |                                                 |
| <b>*PSYRMG_</b><br><b>RS04445</b> | DNA topoisomerase            | 59,28% with | 356 | Topoisom_I      | 94-292  | Eukaryotic DNA topoisomerase I, catalytic core  |
|                                   |                              | PslN        |     |                 |         |                                                 |

\*These genes are encoded outside the putative *psl*-like cluster.

**Supplementary Table 2. Strains belonging to representative plant-associated phylogenetic groups of the *Pseudomonas syringae* complex.**

| Strain                                                               | Code            | Isolation                       | Phylogroup<br>(PG) | Accession number  |
|----------------------------------------------------------------------|-----------------|---------------------------------|--------------------|-------------------|
| <i>Pseudomonas syringae</i> pv. <i>aceris</i> strain ICMP2802        | PsaICMP2802PG2  | Acer sp.                        | 2                  | NZ_LJPM00000000.1 |
| <i>Pseudomonas syringae</i> pv. <i>aceris</i> strain A10853          | PsaA10853PG2    | -                               | 2                  | NZ_LGAR00000000.1 |
| <i>Pseudomonas syringae</i> pv. <i>syringae</i> B728a                | PssB728aPG2     | Bean                            | 2                  | NZ_QJTV00000000.1 |
| <i>Pseudomonas syringae</i> pv. <i>syringae</i> B301D                | PssB301DPG2     | Pear                            | 2                  | NZ_CP005969.1     |
| <i>Pseudomonas syringae</i> pv. <i>aptata</i> str. DSM50252          | PsaDSM50252PG2  | Sugar beet                      | 2                  | AEAN00000000.1    |
| <i>Pseudomonas syringae</i> pv. <i>atrofaciens</i> strain<br>LMG5095 | PsaLMG5095PG2   | Common<br>wheat                 | 2                  | NZ_CP028490.1     |
| <i>Pseudomonas syringae</i> pv. <i>syringae</i> UMAF0158             | PssUMAF0158PG2  | Mango                           | 2                  | NZ_CP005970.1     |
| <i>Pseudomonas caricapapayae</i> ICMP2855                            | PcICMP2855PG6   | <i>Carica</i><br><i>papaya</i>  | 6                  | NZ_LJPW00000000.1 |
| <i>Pseudomonas syringae</i> pv. <i>helianthi</i> strain ICMP4531     | PshICMP4531PG6  | Sunflower                       | 6                  | NZ_LJQM00000000.1 |
| <i>Pseudomonas syringae</i> pv. <i>tagetis</i> strain ICMP4091       | PstICMP4091PG6  | <i>Tagetes</i><br><i>erecta</i> | 6                  | NZ_LJRM00000000.1 |
| <i>Pseudomonas savastanoi</i> pv. <i>savastanoi</i> NCPPB 3335       | PssNCPPB3335PG3 | Olive                           | 6                  | NZ_CP008742.1     |
| <i>Pseudomonas savastanoi</i> pv. <i>phaseolicola</i> 1448A          | Psp1448APG3     | Bean                            | 3                  | NC_005773.3       |
| <i>Pseudomonas savastanoi</i> pv. <i>glycinea</i> strain<br>ICMP2189 | PsgICMP2189PG3  | Soybean                         | 3                  | NZ_LJQL00000000.1 |

|                                                                          |                 |                          |    |                   |
|--------------------------------------------------------------------------|-----------------|--------------------------|----|-------------------|
| <i>Pseudomonas coronafaciens</i> pv. <i>coronafaciens</i> strain<br>3113 | Pc3113PG4       | Oat                      | 4  | NZ_RBUJ00000000.1 |
| <i>Pseudomonas coronafaciens</i> pv. <i>porri</i> strain<br>ICMP8961     | PcpICMP8961PG4  | Leek                     | 4  | NZ_LJRA00000000.1 |
| <i>Pseudomonas coronafaciens</i> pv. <i>oryzae</i> strain I_6            | Pc1_6PG4        | Rice                     | 4  | NZ_CP046035.1     |
| <i>Pseudomonas coronafaciens</i> pv. <i>garcae</i> strain<br>ICMP4323    | PcgICMP4323PG4  | Coffee                   | 4  | NZ_LJQK00000000.1 |
| <i>Pseudomonas cannabina</i> strain ICMP 2823                            | PcICMP2823PG5   | Hemp                     | 5  | NZ_FNKU00000000.1 |
| <i>Pseudomonas cannabina</i> strain ICMP 2821                            | PcICMP2821PG5   | Hemp                     | 5  | NZ_RBOW00000000.1 |
| <i>Pseudomonas syringae</i> pv. <i>coriandricola</i> strain<br>ICMP12471 | PscICMP12471PG5 | Coriander                | 5  | NZ_LJPZ00000000.1 |
| <i>Pseudomonas syringae</i> CC1557                                       | PsCC1557        | Snow                     | 10 |                   |
| <i>Pseudomonas syringae</i> pv. <i>actinidiae</i> str. NCPPB 3871        | PsaNCPBP3871PG1 | Kiwi                     | 1  | NZ_LKEN00000000.1 |
| <i>Pseudomonas syringae</i> pv. <i>actinidiae</i> str. NCPPB 3739        | PsaNCPBP3739PG1 | Kiwi                     | 1  | NZ_AFTH00000000.1 |
| <i>Pseudomonas syringae</i> pv. <i>delphinii</i> strain ICMP529          | PsdICMP529PG1   | <i>Delphinium</i><br>sp. | 1  | NZ_LJQH00000000.1 |
| <i>Pseudomonas syringae</i> pv. <i>tomato</i> str. DC3000                | Pst3000PG1      | Tomato                   | 1  | NC_004578.1       |
| <i>Pseudomonas syringae</i> pv. <i>apii</i> strain ICMP2814              | PsaICMP2814PG1  | Celery                   | 1  | NZ_LJPR00000000.1 |
| <i>Pseudomonas syringae</i> pv. <i>tomato</i> NCPPB 1108                 | PstNCPBP1108PG1 | Tomato                   | 1  | NZ_ADGA00000000.1 |
| <i>Pseudomonas syringae</i> pv. <i>maculicola</i> strain<br>ICMP3935     | PsmICMP3935PG1  | Broccoli                 | 1  | NZ_LJQR00000000.1 |

|                                                                 |                 |                    |    |                   |
|-----------------------------------------------------------------|-----------------|--------------------|----|-------------------|
| <i>Pseudomonas viridiflava</i> strain CFBP 1590                 | PvCFBP1590PG7_8 | Tomato             | 7  | NZ_LT855380.1     |
| <i>Pseudomonas syringae</i> pv. <i>primulae</i> strain ICMP3956 | PspICMP3956PG7  | <i>Primula</i> sp. | 7  | NZ_LJRC00000000.1 |
| <i>Pseudomonas syringae</i> pv. <i>ribicola</i> strain ICMP3882 | PsrICMP3882PG7  | Golden<br>currant  | 7  | NZ_LJRF00000000.1 |
| <i>Pseudomonas cichorii</i> strain ICMP 3353                    | PcICMP3353PG11  | Tomato             | 11 | NZ_RBRE00000000.1 |
| <i>Pseudomonas cichorii</i> strain ICMP 6917                    | PcICMP6917PG11  | Safflower          | 11 | NZ_RBRY00000000.1 |
| <i>Pseudomonas cichorii</i> strain ICMP 1649                    | PcICMP1649PG11  | Celery             | 11 | NZ_RBPN00000000.1 |
| <i>Pseudomonas aeruginosa</i> PAO1                              | PaPAO1          | Outgroup           |    | NC_002516.2       |

**Supplementary Table 3. Primers used in this study.**

| Primers code                  | Primers sequence 5'→3'                   | Use                              | Reference  |
|-------------------------------|------------------------------------------|----------------------------------|------------|
| <i>alg8_fw_up</i>             | CGTCGTTATCCCGATTCTGG                     | To amplify <i>alg8</i> upstream  | This study |
| <i>alg8_HindIII_rv_up</i>     | CCCTATAGTGAGTCAAGCTTCGTATCCCTAAGTCAGTTGC | sequence (1039 pb)               |            |
| <i>alg8_HindIII_fw_down</i>   | AAGCTTGACTCACTATAGGGATGAATACAGCCGTGAATGC | To amplify <i>alg8</i>           | This study |
| <i>alg8_rv_down</i>           | CGCTCAGGTTGGTGCTGCTG                     | downstream sequence<br>(1044 pb) |            |
| <i>wssE_fw_up</i>             | CAACCACAGCACCTCCGAAG                     | To amplify <i>wssE</i>           | This study |
| <i>wssE_HindIII_rv_up</i>     | CCCTATAGTGAGTCAAGCTTGACGTCTCCAGGATAATTTG | upstream sequence (1022<br>pb)   |            |
| <i>wssE_HindIII_fw_down</i>   | AAGCTTGACTCACTATAGGGATGCCTTCCGTTCTTGCCGG | To amplify <i>wssE</i>           | This study |
| <i>wssE_rv_down</i>           | CTACCGTCGGACTGTGCGGT                     | downstream sequence<br>(1023 pb) |            |
| <i>pslE_fw_up</i>             | CACACGCATCGTCTGGTCAA                     | To amplify <i>pslE</i> upstream  | This study |
| <i>pslE_HindIII_rv_up</i>     | CCCTATAGTGAGTCAAGCTTGTCTGTTTCCCTGACAATTA | sequence (1090 pb)               |            |
| <i>pslE_HindIII_fw_down</i>   | AAGCTTGACTCACTATAGGGCGGATCGGGAGCCGAGGCTG | To amplify <i>pslE</i>           | This study |
| <i>pslE_rv_down</i>           | CATGCCGTTGCCATGCGAGA                     | downstream sequence<br>(1042 pb) |            |
| Compl_HindIII_ <i>alg8_fw</i> | AAAAAAGCTTGCTTGCAGCCTGGGGCTTGA           | To amplify the <i>alg8</i> gene  | This study |
| Compl_BamHI_ <i>alg8_rv</i>   | AATCTAGATCAAACCATCGTCAACAGCA             | and rbs sequence (1530<br>pb)    |            |

|                                |                               |                                                                    |            |
|--------------------------------|-------------------------------|--------------------------------------------------------------------|------------|
| Compl_HindIII_ <i>wssE</i> _fw | AAAAAGCTTCTATCAGTTCCGTGAAGACG | To amplify the <i>wssE</i> gene and rbs sequence (3924 pb)         | This study |
| Compl_BamHI_ <i>wssE</i> _rv   | AATCTAGATCAGTTGGAATAAGGTGAAC  |                                                                    |            |
| Compl_HindIII_ <i>pslE</i> _fw | AAAAAGCTTCATGAATTACGAGCTGCGCA | To amplify the <i>pslE</i> gene and rbs sequence (2040 pb)         | This study |
| Compl_BamHI_ <i>pslE</i> _rv   | AATCTAGATCAGCCTCGGCTCCCGATCC  |                                                                    |            |
| qRT-PCR158_ <i>gyrB</i> _F     | TGCTGACCTTCTTCTTCCGT          | To amplify a fragment of the <i>gyrB</i> gene by q-RT-PCR (198 pb) | This study |
| qRT-PCR158_ <i>gyrB</i> _R     | AGATACCTGGAGCCGATTCCG         |                                                                    |            |
| qRT-PCR158_ <i>rpoD</i> _F     | CGAAGAAGGCATCCGTGAAG          | To amplify a fragment of the <i>rpoD</i> gene by q-RT-PCR (120 pb) | This study |
| qRT-PCR158_ <i>rpoD</i> _R     | CTCAGAACATCGGAAAGGCG          |                                                                    |            |
| qRT-PCR158_ <i>rhlA</i> _F     | TCAGCCAGATTCGCCAACTA          | To amplify a fragment of the <i>rhlA</i> gene by q-RT-PCR (198 pb) | This study |
| qRT-PCR158_ <i>rhlA</i> _R     | CCTTGCTTTCCAGGTCCAGA          |                                                                    |            |
| qPCR_ <i>pslD</i> _F           | TGTTTCAGGTGCTCAACGAC          | To amplify a fragment of the <i>pslD</i> gene by q-RT-PCR (150 pb) | This study |
| qPCR_ <i>pslD</i> _R           | GGGAAATGTTGATGGTCAGC          |                                                                    |            |
| qPCR_ <i>pslF</i> _F           | CGTGATGGTTCTGCCCTATC          | To amplify a fragment of the <i>pslF</i> gene by q-RT-             | This study |
| qPCR_ <i>pslF</i> _R           | GTTGCCATGCGAGACTTCTT          |                                                                    |            |

|    |                              | PCR (154 pb)                  |             |
|----|------------------------------|-------------------------------|-------------|
| B1 | <i>CTTCCGTGGTCTTGATGAGG</i>  | To amplify a fragment of      | Sorensen et |
| B2 | <i>TCGATTTTGCCGTGATGAGTC</i> | the <i>syrB</i> gene (752 pb) | al. 1998    |

Nucleotide bases in italics show the sequences used for the phusion of the fragments amplified for mutation. Underlined bases show restriction sequences.
